# Supplementary material for: Synergy and antagonism in the integration of BCR and CD40 signals that control B-cell proliferation
Source: PubMed Central journal article supplement — bioRxiv. 2024 Jul 29:2024.07.28.605521. Preprint. [Version 1] doi: 10.1101/2024.07.28.605521 (PMC11312454; doi:10.1101/2024.07.28.605521), 2024-07-29
Supplement: NIHPP2024.07.28.605521V1-supplement-1.pdf [file NIHPP2024.07.28.605521V1-supplement-1.pdf]

895 SUPPLEMENTAL MATERIALS: Supplemental Figures and Materials and Methods  
896

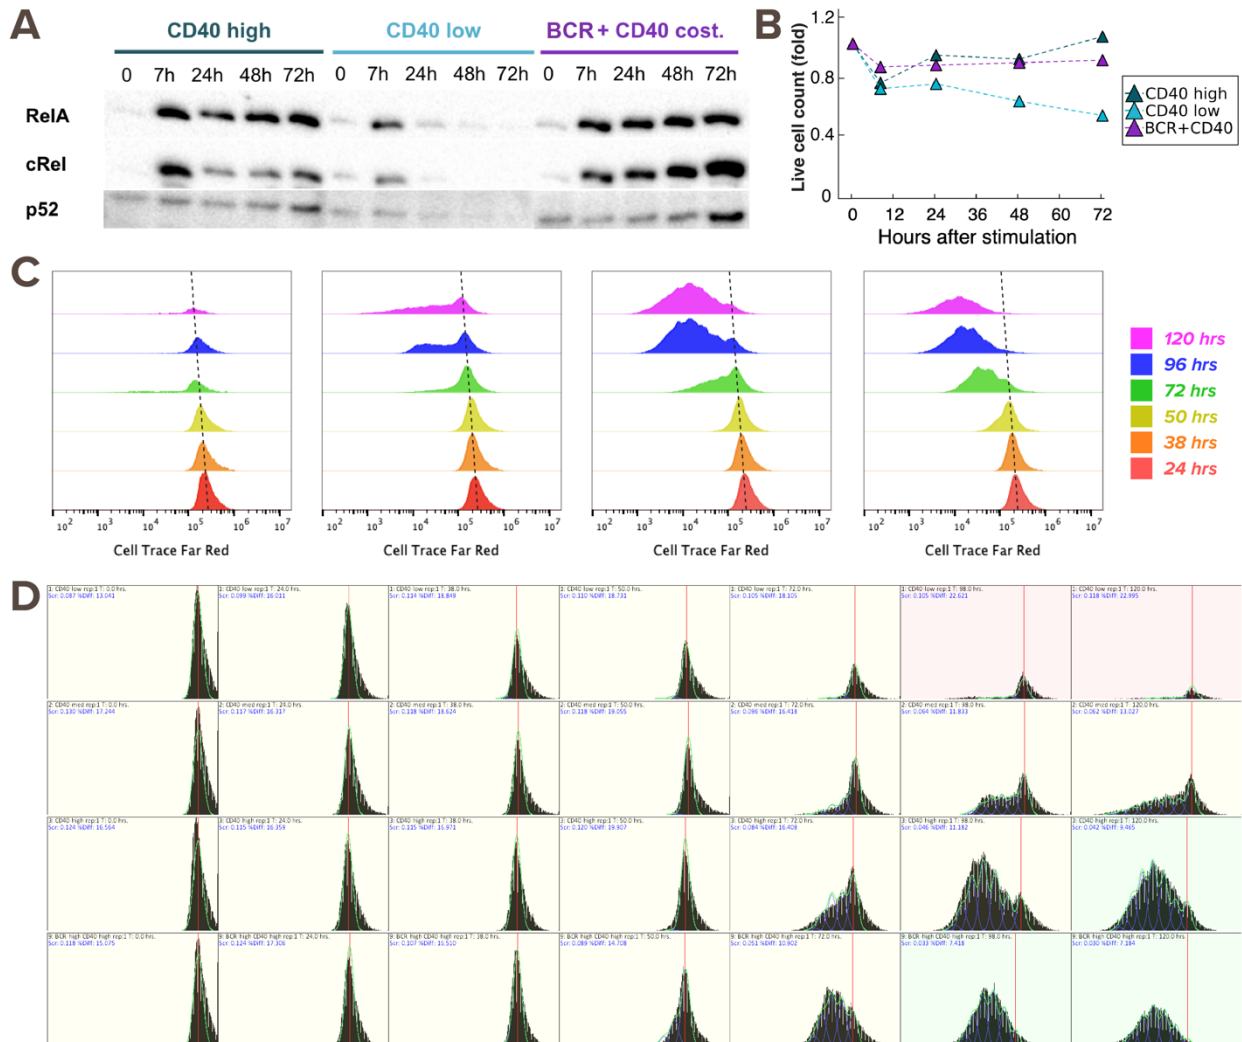

897  
898 **Figure S1. Raw experimental data to test the multi-scale B-cell model. (A)** Immunoblot from  
899 experiments with 600K founder B-cells show nuclear RelA, cRel, and p52 levels at 0, 7, 24, 48,  
900 and 72hrs after stimulation with low  $\alpha$ -CD40 (1 $\mu$ g/mL), high  $\alpha$ -CD40 (10 $\mu$ g/mL), or costimulation  
901 with high  $\alpha$ -CD40 and  $\alpha$ -IgM (10 $\mu$ g/mL). **(B)** Line graph of live B-cell count (fold-change)  
902 for each timepoint in (A), to which the samples are adjusted when loading to the gel. The cell count  
903 fluctuation is due to cell death, cell division, and technical error when transferring cells. **(C)** Cell  
904 Trace Far Red (CTFR) dye dilution fluorescence histogram for B-cells stimulated with (from left  
905 to right) low (1 $\mu$ g/mL), medium (3.3 $\mu$ g/mL), and high (10 $\mu$ g/mL) dose of  $\alpha$ -CD40 and  
906 costimulation of high  $\alpha$ -CD40 and  $\alpha$ -IgM (10 $\mu$ g/mL). There is a baseline shift in CTFR  
907 fluorescence by about 2-fold from 24hrs to 120hrs (dotted line), which we adjusted when  
908 deconvolving the cells into each generation. **(D)** Deconvolution of the time courses in (C) into  
909 each generation, where the red line indicates the center of the undivided population of cells, the  
910 blue lines indicate individual proliferation peaks, and the green line represents the model sum.  
911  
912

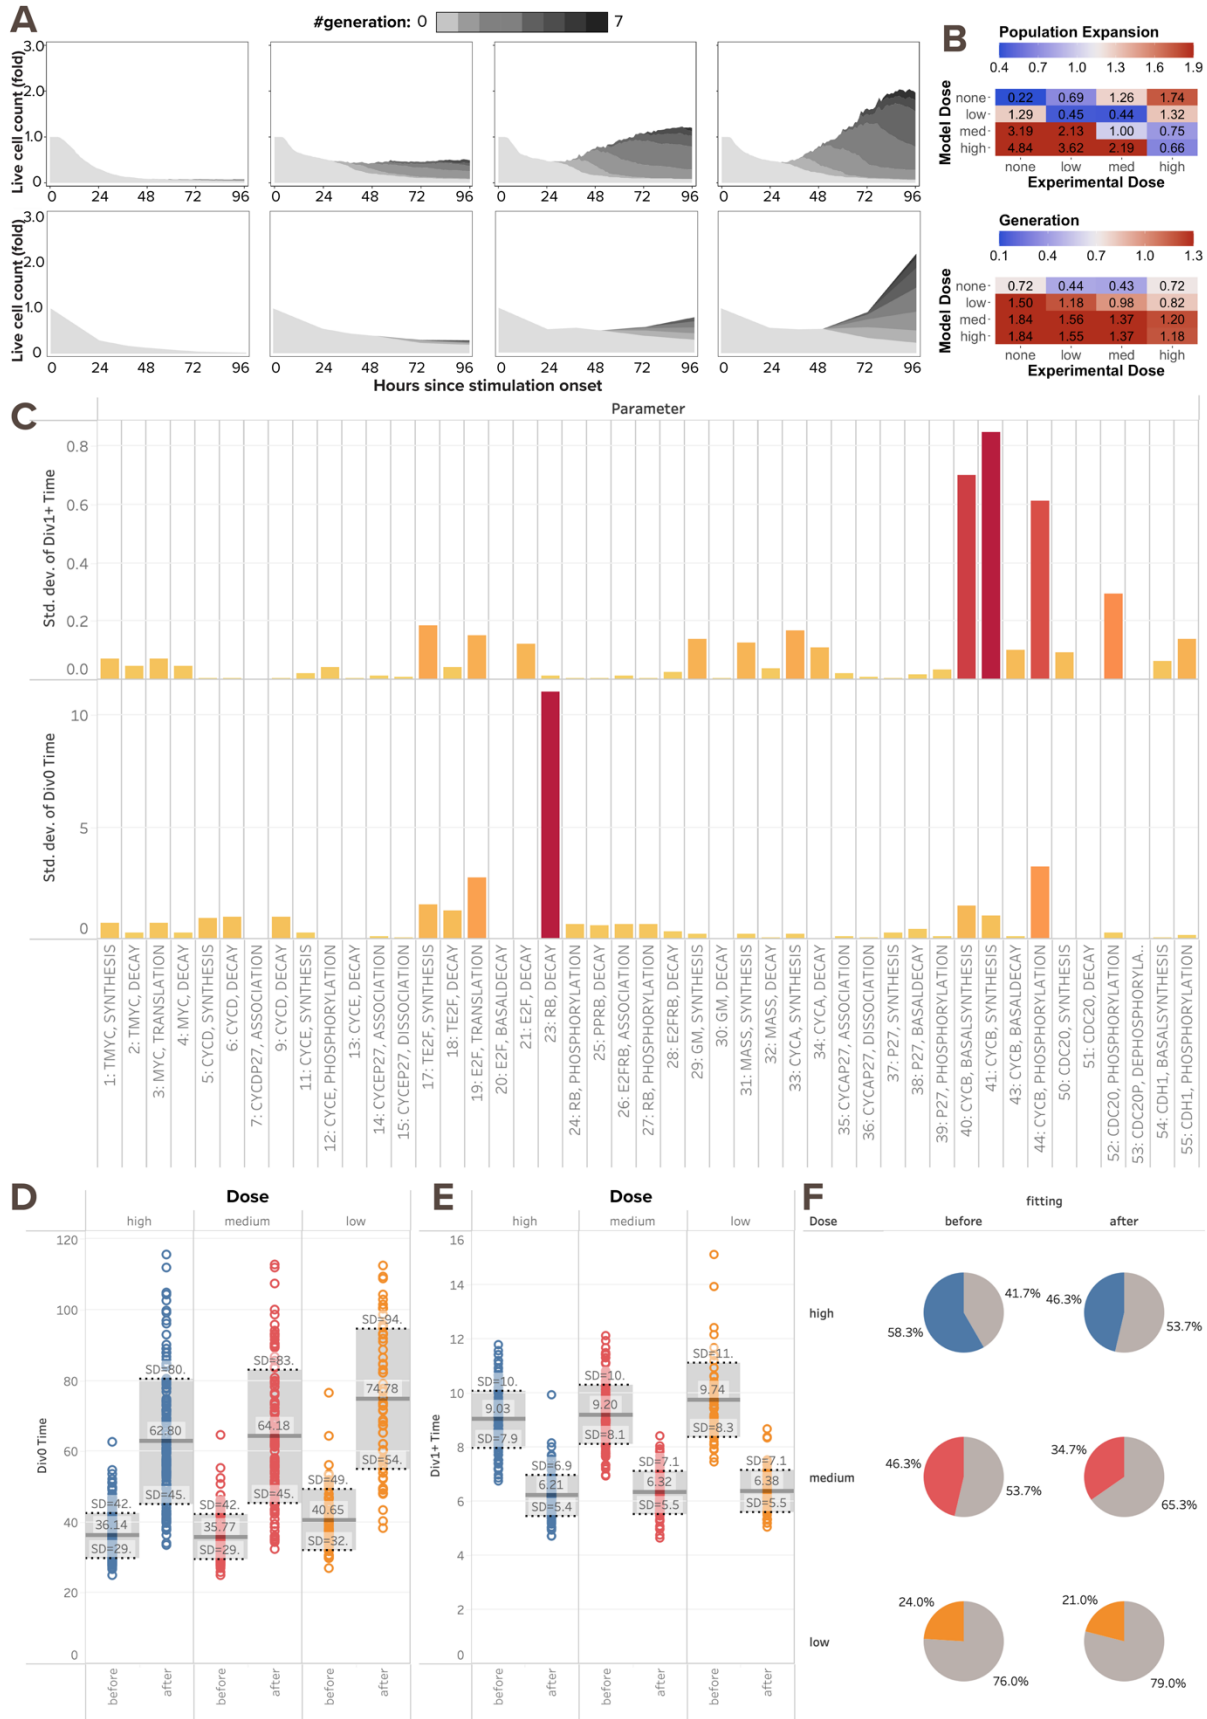

914 **Figure S2. Multi-scale model needs tuning to recapitulate B-cell population dynamics in**  
915 **response to CD40 stimulation.**

916 **(A)** Stacked area plots from model simulations of 1000 virtual B-cells (top) and matching  
917 experiments with 19196 founder B-cells (bottom) show their population dynamics in response to  
918 stimulation with (from left to right) no (0nM and 0 $\mu$ g/mL), low (6nM and 1 $\mu$ g/mL), medium (12nM  
919 and 3.3 $\mu$ g/mL), and high (30nM and 10 $\mu$ g/mL) dose of  $\alpha$ -CD40. Each subsequent generation of  
920 proliferating cells is indicated with a darker gray. **(B)** Heatmap shows RMSD of relative  
921 population size expansion (top) and generation composition (bottom) in matching (diagonal) or  
922 mismatching (off-diagonal) model-and-experiment pairs. Some model doses (medium and low,  
923 respectively), indicating a subpar fit. **(C)** Bar graph from local sensitivity analysis of parameters  
924 in the cell cycle module shows their standard deviations in time to first division (Tdiv0) and time  
925 to later divisions (Tdiv1+). Local sensitivity analysis is achieved by repetitive simulations that  
926 independently scaling each parameter in the cell cycle module by 0.2, 0.33, 0.4, 0.5, 0.66, 1.0,  
927 1.5, 2.0, 2.5, 3.0, or 5.0-fold. 2 out of 55 parameters stand out as the best candidates for tuning  
928 Tdiv0 and Tdiv1+: retinoblastoma (Rb) decay rate and cyclin B (CycB) synthesis rate,  
929 respectively. These parameters were tuned in order to achieve a later and more dose-  
930 responsive Tdiv0, shorter Tdiv1+, and smaller divider percentage. **(D)** Box plots from model  
931 simulations of 300 virtual B-cells show the mean Tdiv0 increases for all doses after parameter  
932 tuning. **(E)** Box plots from model simulations of 300 virtual B-cells show the mean Tdiv1+  
933 decreases for all doses after parameter tuning. **(F)** Pie charts from model simulations of 300  
934 virtual B-cells show the percentage of dividing cells (colored slices) out of all founder cells  
935 decreases for all doses, while maintaining CD40 dose-responsiveness. Grey slices are the non-  
936 dividing founder cells that either die or survive without division.

937  
938  
939

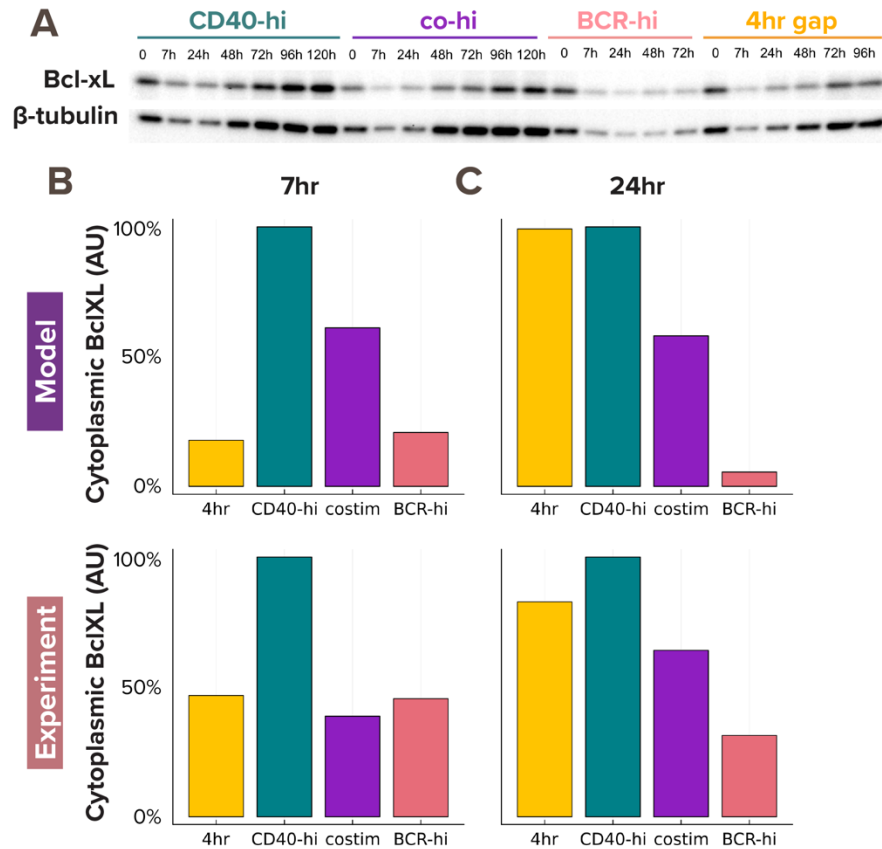

940  
941  
942  
943  
944  
945  
946  
947  
948

**Figure S3. Model-simulated cytoplasmic BclXL level recapitulates experimental results.** (A) Immunoblot from experiments with 600K founder B-cells show cytoplasmic Bcl-xL and  $\beta$ -tubulin levels in response to stimulation with (from left to right) high (10 $\mu$ g/mL) dose of  $\alpha$ -CD40, high  $\alpha$ -CD40 and high  $\alpha$ -BCR, high  $\alpha$ -BCR, and sequential stimulation of high  $\alpha$ -BCR and high  $\alpha$ -BCR with a 4hr delay. (B-C) Bar graphs from model simulations (top) and experiments (bottom) show consistent max-normalized quantification of cytoplasmic Bcl-xL level at (B) 7hrs and (C) 24hrs.

949 **MATERIALS AND METHODS**

950

951

952

**Key Resources Table**

| <b>REAGENT RESOURCE</b>                              | <b>or</b> | <b>SOURCE</b>                                         | <b>IDENTIFIER</b>                        |
|------------------------------------------------------|-----------|-------------------------------------------------------|------------------------------------------|
| <b>Antibodies</b>                                    |           |                                                       |                                          |
| Rabbit polyclonal anti-RelA                          |           | Santa Cruz Biotechnologies                            | sc-372;<br>RRID: AB_632037               |
| Rabbit polyclonal anti-cRel                          |           | Santa Cruz Biotechnologies                            | sc-71;<br>RRID: AB_2253705               |
| Rabbit polyclonal anti-p50                           |           | Santa Cruz Biotechnologies                            | sc-114;<br>RRID: AB_632034               |
| Mouse monoclonal anti-Bcl-xL                         |           | Santa Cruz Biotechnologies                            | sc-8392;<br>RRID: AB_626739              |
| Rabbit polyclonal anti-p84                           |           | Abcam                                                 | ab131268                                 |
| Mouse monoclonal anti- $\beta$ -tubulin              |           | Sigma Aldrich                                         | T5201;<br>RRID: AB_609915                |
| HRP Anti-mouse secondary                             |           | Cell Signaling Technology                             | 7076;<br>RRID: AB_330924                 |
| HRP Anti-rabbit secondary                            |           | Cell Signaling Technology                             | 7074;<br>RRID: AB_2099233                |
| CD40 monoclonal antibody (IC10)                      |           | Invitrogen                                            | 16-0401-86;<br>RRID: AB_468940           |
| Goat anti-mouse IgM                                  |           | Jackson ImmunoResearch                                | 115-066-020;<br>RRID: AB_2338579         |
| <b>Chemicals, Peptides, and Recombinant Proteins</b> |           |                                                       |                                          |
| Recombinant murine IL-4                              |           | PeproTech                                             | 214-14                                   |
| <b>Critical Commercial Assays</b>                    |           |                                                       |                                          |
| CellTrace™ Far Red Proliferation Kit                 |           | ThermoFisher Scientific                               | C34564                                   |
| SuperSignal West                                     |           | ThermoFisher Scientific                               | 34095, 34580                             |
| <b>Experimental Models: Organisms/Strains</b>        |           |                                                       |                                          |
| Mouse: C57BL/6                                       |           | The Jackson Laboratory                                | JAX: 000664;<br>RRID:<br>IMSR_JAX:000664 |
| <b>Software and Algorithms</b>                       |           |                                                       |                                          |
| FlowJo V10.8.1                                       |           | FlowJo LLC                                            | N/A                                      |
| FlowMax                                              |           | Shokhirev et al., 2015 (Shokhirev and Hoffmann, 2013) | N/A                                      |
| Python base:conda v3.7.164-bit                       |           | Anaconda v3.0                                         | N/A                                      |

| REAGENT<br>RESOURCE | or | SOURCE | IDENTIFIER |
|---------------------|----|--------|------------|
| ImageJ2 v2.9.0      |    |        | N/A        |
| Julia v1.9.3        |    |        | N/A        |
| R v4.2.0            |    |        | N/A        |

953

954

955

### Mice

956 Mice were maintained in environmental control facilities at the University of California, Los  
957 Angeles. Female C57BL/6 mice in each replicate experiment were littermates, and were 8-  
958 13 weeks old unless otherwise indicated. Animal work was performed according to University of  
959 California, Los Angeles under approved protocols.

960

961

### B cell isolation and culture

962 Spleens were harvested from 8–13-week-old female C57BL/6 mice. Homogenized splenocytes  
963 were incubated with anti-CD43 magnetic beads for 15 min at 4–8°C, washed with MACS buffer  
964 and passed through an LS column (Miltenyi Biotech). The purity of B cells was assessed at >97%  
965 based on B220 staining as described previously (Mitchell et al., 2018). Following isolation, B cells  
966 were stimulated with anti-CD40 (H: 10ug/mL, M: 3.3ug/mL, L: 1ug/mL), IL-4 (H: 20ng/mL, M:  
967 6.6ng/mL, L: 2ng/mL), and anti-IgM (H: 10ug/mL, L: 1ug/mL), unless otherwise specified, and  
968 cultured for 4 days in fresh RPMI-based media at 37°C and 5% CO<sub>2</sub>. All anti-CD40 stimulation  
969 conditions mentioned in the results are stimulated with both anti-CD40 and IL-4 at corresponding  
970 doses.

971

972

### Immunoblot

973 Cells were harvested from culture plates, washed in 1mL PBS and counted on a CytoFlex flow  
974 cytometer (CytoFLEX, Beckman Coulter), prior to preparing lysates for protein content analysis.  
975 Due to varying cell sizes and numbers over time as a result of growth and proliferation, an equal  
976 number of cells (as opposed to equal protein amounts) per sample was analyzed in each  
977 immunoblot. In cases where nuclear fractions were required to be separated, cells were first lysed  
978 in CE buffer on ice, followed by vortexing and centrifugation, and the supernatant containing the  
979 cytoplasmic fraction was removed. Nuclei were then lysed by 3 repeated freeze-thaw cycles  
980 between 37C water and dry ice, followed by centrifugation to clear the lysate of nuclear debris,  
981 after which the supernatant containing the nuclear fraction was harvested.

982 For immunoblotting, lysates were run on 4%–15% Criterion TGX pre-cast polyacrylamide gels  
983 (Bio-Rad), and transferred on to PVDF membranes using wet transfer. The following antibodies  
984 were used to identify the proteins of interest: RelA, cRel, Bcl-xL, p84 (loading control for nuclear  
985 lysates), and b-tubulin (loading control for cytoplasmic and whole cell lysates). Antibody details  
986 are given in the Resources table, and concentrations used were 1:5,000 for RelA and cRel,  
987 1:1,000 for Bcl-xL, 1:10,000 for p84, and 1:10,000 for b-tubulin. Protein bands were detected  
988 using the Bio-Rad ChemiDoc XRS System, with a 10:1 mixture of the SuperSignal West Pico and  
989 Femto Maximum Sensitivity Substrates (Thermo Scientific) applied to detect chemiluminescence  
990 released by HRP-labeled secondary antibodies.

991 RelA, cRel, and Bcl-xL bands were quantified by measuring mean gray value using ImageJ2,  
992 deducting background value per lane (measured by a box of the same size directly below the  
993 target protein band), and normalizing intensities to the 0hr baseline.

994

995

### Media and buffer compositions



996 B cell media: RPMI 1650 (Gibco) supplemented with 100 IU Penicillin, 100 µg/ml Streptomycin, 5  
997 mM L-glutamine, 20 mM HEPES buffer, 1mM MEM non-essential amino acids, 1 mM Sodium  
998 pyruvate, 10% FBS, and 55 µM 2-Mercaptoethanol.  
999 MACS buffer: Phosphate buffered saline, (pH 7.4) and 2% bovine serum albumin.  
1000 CE Buffer: 50 mM HEPES-KOH pH 7.6, 140 mM NaCl, 1 mM EDTA, 0.5% NP-40, freshly  
1001 supplemented with EDTA-free protease inhibitors (5mM DTT, 1mM PMSF).  
1002 NE Buffer: 10 mM Tris-HCl, pH 8.0, 200 mM NaCl, 1 mM EDTA, freshly supplemented with  
1003 EDTA-free protease inhibitors (5mM DTT, 1mM PMSF).  
1004

### 1005 **Measurement of generation-specific B cells by CTFR staining**

1006 B cells were stained with Cell Trace Far Red (CTFR) using CellTrace Far Red Cell Proliferation  
1007 Kit (ThermoFisher Scientific, # C34564) as described by the manufacturer protocol. Briefly, 2M  
1008 cells were resuspended in 1mL RT PBS and incubated with 1µL CTFR for 25 min at RT with  
1009 rotation. Cells were washed by centrifugation, resuspension in 1mL RPMI with 10% FBS, and  
1010 incubation for 10 min at RT. The washing steps were repeated 2 more times. CTFR labeled cells  
1011 were treated with anti-CD40, IL-4, and / or anti-IgM for 96hrs as described above. The cells were  
1012 harvested at indicated time points and acquired on the CytoFlex flow cytometer (CytoFLEX,  
1013 Beckman Coulter). The cells were gated based on forward scatter (FSC) and side scatter (SSC)  
1014 to identify live single cells. Doublets were then excluded from the analysis using FSC area and  
1015 height. To deconvolve the cells into different generations based on dilution of CTFR, we used the  
1016 Proliferation Modeling feature on FlowJo V10.8.1. Specifically, generation-0 cells were gated as  
1017 “Undivided” in the APC-A channel according to the unstimulated control and 24hr samples, and  
1018 the number of peaks were set based on visual estimation and then further adjusted based on the  
1019 Peak Ratio and Root Mean Squared outputs to optimize curve fitting.  
1020

### 1021 **Computational modeling of the T-dependent receptor signaling pathway**

1022 The mathematical model of T-dependent (TD) B cell stimulation was developed in two parts.  
1023 First, we expanded the previously published BCR-signaling ODE model (Shinohara *et al.*, 2014;  
1024 Inoue *et al.*, 2016) by including the BCR receptor antigen binding (Fig. 1A left side), and scaled  
1025 the parameters to match the units ( $\text{nM}^{-1} \text{hr}^{-1}$ ) in the rest of our model. The Shinohara and Inoue  
1026 models prescribed a signal function for the CBM complex, a downstream adaptor for BCR  
1027 receptor. We bridged the gap between antigen concentration and CBM signaling with a few  
1028 additional ODE equations, and tuned these additional parameters (Table 1) such that the  
1029 signaling dynamics matched the previous version:

$$1030 \quad \frac{d}{dt} [ANTIGEN] = -\varphi_1 * [ANTIGEN] - \varphi_4 [ANTIGEN] * [BCR] * C_{c2m} + \varphi_5 * [ABCR] * C_{c2m}$$

$$1031 \quad \frac{d}{dt} [BCR] = \varphi_2 - \varphi_3 * [BCR] - \varphi_4 * [ANTIGEN] * [BCR] + \varphi_5 * [ABCR]$$

$$1032 \quad \frac{d}{dt} [ABCR] = \varphi_4 [ANTIGEN] * [BCR] - \varphi_5 * [ABCR] - \varphi_6 * [ABCR]$$

1033 where  $[ANTIGEN]$ ,  $[BCR]$ , and  $[ABCR]$  are the concentrations of the antigen, BCR, and their  
1034 complex;  $\varphi_i$ ,  $i = 1,2,3, \dots$ , are the reaction constants (index are listed in Table 1);  $C_{c2m} = 0.01$  is  
1035 a scaling factor for external ligands like ANTIGEN to convert cellular concentration to media  
1036 concentration. In this model,  $[ANTIGEN]$  is the model input corresponds to experimental  
1037 stimulation  $\alpha$ -BCR. As output of the BCR receptor module,  $[ABCR]$  regulates CBM complex  
1038 activation (Fig. 1A left side).  
1039

1040 Next, we abstracted the CD40 model from its known signaling pathway (Elgueta *et al.*, 2009;  
1041 Akiyama, Shinzawa and Akiyama, 2012) in a parsimonious way. As mentioned in the  
1042 discussion, to avoid the complexity of combinatorial biochemical reactions among the TRAF  
1043 complexes, we used TRAF3 to represent the TRAF2-TRAF3 complex that constitutively inhibits

1044 the noncanonical NFκB pathway, and TRAF6 to represent the TRAF1-TRAF2, TRAF3-TRAF5,  
1045 and TRAF6-TRAF2 complexes that all activate the canonical NFκB pathway.

$$1046 \quad \frac{d}{dt}[CD40L] = -\varphi_{11} * [CD40L] - \varphi_{14}[CD40L] * [CD40R] * C_{c2m} + \varphi_{15} * [CD40LR] * C_{c2m}$$

$$1047 \quad \frac{d}{dt}[CD40R] = \varphi_{12} - \varphi_{13} * [CD40R] - \varphi_{14} * [CD40L] * [CD40R] + \varphi_{15} * [CD40LR]$$

$$1048 \quad \frac{d}{dt}[CD40LR] = \varphi_{14}[CD40L] * [CD40R] - \varphi_{15} * [CD40LR] - \varphi_{16} * [CD40LR]$$

$$1049 \quad \frac{d}{dt}[TRAF6_{off}] = -\varphi_{17} * [CD40LR] * [TRAF6_{off}] + \varphi_{18} * [TRAF6_{on}]$$

$$1050 \quad \frac{d}{dt}[TRAF6_{on}] = \varphi_{17} * [CD40LR] * [TRAF6_{off}] - \varphi_{18} * [TRAF6_{on}]$$

$$1051 \quad \frac{d}{dt}[TRAF3] = \varphi_{19} * [TRAF3] - \varphi_{20} * [TRAF3] - \varphi_{21} * [CD40LR] * [TRAF3]$$

1052 The subsequent kinases that further relay the receptor signal to NFκB signaling are TAK1 (for  
1053 TRAF6) and NIK (for TRAF3). We used a Hill function for TRAF3-induced degradation of NIK to  
1054 abstract a more complicated complex formation process:

$$1055 \quad \frac{d}{dt}[NIK] = \varphi_{35} - \varphi_{36} * [NIK] - \varphi_{37} * [NIK] * \frac{[TRAF3]^2}{[TRAF3]^2 + 0.5^2}$$

1056  
1057 To generate heterogeneous cell responses, the receptor parameter values were distributed in  
1058 each virtual B-cell the same way as the NFκB signaling module in previous publication, where  
1059 synthesis, degradation, association, dissociation rates were drawn from a normal distribution  
1060 with mean values from the standard parameter set (Table 1) and CV of 11.2% (Mitchell *et al.*,  
1061 2018). These ODEs (with 37 parameters and 12 species) were solved using the Tsit5 solver  
1062 algorithm from the DiffEq.jl package in Julia, with an absolute error tolerance of 1e-5 and  
1063 relative error tolerance of 1e-3. All simulations were carried out on an Ubuntu server with 64  
1064 threads, 2.1 to 3.7 GHz speed, and 384 GB RAM.

### 1065 1066 **Multiscale modeling coupling signaling network and B cell proliferation**

1067 The receptor-extended TD model constructed above was combined with a published MATLAB  
1068 model of B cell proliferation to create a multiscale model capable of simulating the division and  
1069 death of a population of individual B-cells upon TD stimulation. The B cell model integrates a  
1070 biophysically accurate model of canonical NFκB signaling (with about 300 parameters and 61  
1071 species) with models of the cell cycle (with 52 parameters and 23 species) and apoptosis (with  
1072 117 parameters and 59 species) (Shokhirev *et al.*, 2015; Mitchell *et al.*, 2018) to create a  
1073 multiscale model capable of simulating the division and death of a population of individual cells  
1074 upon T-dependent stimulation. Cleaved PARP (cParp) in the apoptosis model and cadherin-1  
1075 (Cdh1) concentration thresholds in the cell cycle model triggered virtual B-cell death and  
1076 division, respectively. We translated the model from MATLAB into Julia 1.9.3 for faster  
1077 execution. All reactions and parameters within the NFκB, apoptosis and cell cycle networks  
1078 were maintained and distributed as described by Mitchell *et al.* (Mitchell *et al.*, 2018), except for  
1079 2 parameters in the cell cycle network that were changed to reduce the discrepancy between  
1080 CD40 and CpG-induced proliferative response (Fig. S2, see more details in “Local sensitivity  
1081 analysis to tune CD40-activated cell fates” section of the Methods).

1082  
1083 Separate modules of the multi-scale model were employed when simulating for different  
1084 purposes. For the NFκB dynamics in figure 1, only the receptor-NFκB model was used for the  
1085 simulation, and the cell fate modules (apoptosis and cell cycle) were excluded. For Fig. S2C-F  
1086 when we tuned the CD40-activated cell fates, the cell death module was excluded to enable  
1087 faster turnaround for parameter tuning in the cell cycle module. For Fig. 5B-D, the cell cycle



1088 module was excluded to isolate the effects of BCR signaling on cell survival. All the other model  
1089 simulation used the full multi-scale model. When we reported the population trajectory of NFkB  
1090 activity in Fig. 1E-H, all 1000 cells contributed to the mean and standard deviation, but in Fig.  
1091 4G-J, only cells that are alive at each timepoint contributed to the mean and standard deviation.

1092  
1093 All of the code to run the model simulations and plot the figures is provided on GitHub  
1094 (<https://github.com/helengracehuang/BCR-CD40-integration>). For each virtual B-cell with its own  
1095 set of parameters, we ran the model in two phases to first identify the steady state, and then  
1096 simulate the dynamic time course upon stimulation, with initial states from this steady state. The  
1097 steady state was solved using Julia's steady state Tsit5 solver with an absolute error tolerance  
1098 of 1e-5 and relative error tolerance of 1e-3. The simulation time for which the given ODE reach  
1099 steady state was limited within 800hrs.

### 1100 1101 **Computational modeling of the BCR-induced cell death pathway**

1102 Since we found  $\alpha$ -BCR stimulation had an NFkB-independent anti-survival effect that overrides  
1103 its NFkB-dependent pro-survival effect (Fig. 3), we decided to resolve this difference by  
1104 modifying the multi-scale model. It was reported that ligation of the BCR induces cell death in  
1105 some B cells (Graves, Craxton and Clark, 2004) due to activation of Bcl-2 Interacting Mediator  
1106 of cell death (Bim) (Gao, Kazama and Yonehara, 2012), caspase-2 or -8 (Chen *et al.*, 1999),  
1107 mitochondrial dysfunction (Akkaya *et al.*, 2018) or more. Based on these signaling mechanisms  
1108 that may mediate activation-induced cell death (AICD) in B-cells and the available species in the  
1109 existing cell death module, we revised the cell death module of the T-dependent multi-scale B-  
1110 cell model to include a simplified pathway from activated BCR to caspase-8 processing (Fig.  
1111 4A):

$$1112 \quad \frac{d}{dt}[PC8] = \left( \text{original} \frac{d}{dt}[PC8] \right) - \varphi_{C8,AICD} * [PC8] * [ABCR]$$

$$1113 \quad \frac{d}{dt}[C8] = \left( \text{original} \frac{d}{dt}[C8] \right) + \varphi_{C8,AICD} * [PC8] * [ABCR]$$

1114 where  $[PC8]$ ,  $[C8]$ , and  $[ABCR]$  are the concentrations of the pre-caspase-8, caspase-8, and  
1115 activated BCR; *original*  $\frac{d}{dt}[PC8]$  and *original*  $\frac{d}{dt}[C8]$  are the original differential equations for  
1116 pre-caspase-8 and caspase-8 in Mitchell *et al.*, 2018, abbreviated to highlight the revision we  
1117 made;  $\varphi_{C8,AICD}$  was tuned to be 0.00021 according to experimental data of BCR-CD40  
1118 costimulation versus CD40-only stimulation conditions (Fig. 4B-C).

1119  
1120 Simulations prior to figure 4 and Fig. 5F-H did not include this BCR-induced cell death pathway.  
1121 Fig. 4B-F, Fig. 5A-E, I-K, and figures 6 and 7 were all simulated with the modified caspase-8  
1122 equations.

### 1123 1124 1125 **Model fit evaluation**

1126 Root-mean-squared deviation (RMSD) were calculated on the population dynamics between  
1127 model simulation and experimental results (Fig. 2F, S2B, 3E, 3F, and 4D) and between two  
1128 experimental conditions (Fig. 3H,K) in the same manner. Two RMSD scores, one for population  
1129 expansion index (Fig. 2D), and the other for generational composition (Fig. 2E) between each  
1130 pair of model and experimental outputs at each experimental timepoint (0, 24, 36, 48, 72, and  
1131 96hrs) were calculated.

1132  
1133 For the RMSD on generational composition:

1134

$$RMSD_{gen} = \sqrt{\sum_{i=1}^5 \sum_{j=0}^6 \left( \frac{n_{i,j}}{N_i} - \frac{\hat{n}_{i,j}}{\hat{N}_i} \right)^2}$$

1135 Where  $i$  is the  $i$ -th timepoint of the experimental measurement (i.e.  $i = 1$  corresponds to the  
 1136 measurement at 24 hours, followed by 36, 48, 72, and 96 hours), and  $j$  is the generation  
 1137 number, ranging from generation 0 to 6 corresponding to founder cells to cells that have divided  
 1138 6 times.  $n_{i,j}$  thus means the number of live cells in generation  $j$  and timepoint  $i$  in the  
 1139 experimental data, while  $\hat{n}_{i,j}$  is the corresponding live cell number in generation  $j$  and timepoint  
 1140  $i$  in model simulation. Additionally,  $N_i = \sum_{j=0}^6 n_{i,j}$  represents the total number of live cells at  
 1141 timepoint  $i$  in the experimental data, and  $\hat{N}_i = \sum_{j=0}^6 \hat{n}_{i,j}$  represents the corresponding total live  
 1142 cell number in model simulation.  $\frac{n_{i,j}}{N_i}$  and  $\frac{\hat{n}_{i,j}}{\hat{N}_i}$  are thus the generation decomposition ratios at  
 1143 each time point for experimental data and simulation data, respectively.

1144

1145 For population expansion, the RMSD is composed of two parts, one normalized to population  
 1146 size at 0 hour ( $N_0$ ) and one normalized to the population size at 24 hours ( $N_1$ ) to account for  
 1147 unpredictable mechanical cell death (which typically occur within the first few hours) as a form of  
 1148 technical error in experiments. Both RMSD scores are then normalized to the number of  
 1149 timepoints (5 timepoints for 0hr normalization, and 4 timepoints for 24hr normalization) and the  
 1150 maximum population expansion so that different amount of population expansion at different  
 1151 doses are evaluated on the same scale:

1152

$$RMSD_{pop\_exp} = \sqrt{\frac{\sum_{i=1}^5 \left( \frac{N_t}{N_0} - \frac{\hat{N}_t}{\hat{N}_0} \right)^2}{5 \cdot \max_{i=1,\dots,5} N_i}} + \sqrt{\frac{\sum_{i=2}^5 \left( \frac{N_t}{N_1} - \frac{\hat{N}_t}{\hat{N}_1} \right)^2}{4 \cdot \max_{i=2,\dots,5} N_i}}$$

1153

### 1154 **Local sensitivity analysis to tune CD40-activated cell fates**

1155 Due to the discrepancy between CD40 and CpG-induced proliferative response, we quantified  
 1156 several key variables in the dye dilution data that determined the population dynamics with  
 1157 FlowMax (Shokhirev and Hoffmann, 2013). After fitting FlowMax model to the experimental  
 1158 data, we quantified the time to first division (Tdiv0), time to later divisions (Tdiv1+), and the  
 1159 fraction of generation 0 cells that respond by dividing (F0) in response to low, medium, and high  
 1160 CD40 doses. In all CD40 doses, the average Tdiv0 is much later and more dose-specific (68.5  
 1161 to 76.9hrs since stimulation onset for high to low dose of CD40) than what the model predicted  
 1162 (36.1 to 40.6hrs). On the other hand, the average Tdiv1+ of the CD40 experimental data were  
 1163 mostly shorter than predicted by the model (Table S1 Exp vs Model(1), Fig. S2A), and the  
 1164 proportion of dividers was lower, indicated by a larger amount of cells in generation 0 at 96hrs in  
 1165 Fig. S2A and a smaller F0 quantified by FlowMax than the model predicted (Table S2 Exp vs  
 1166 Model(1)).

1167

1168 To improve model fit, we identified locally sensitive parameters in the cell cycle module that  
 1169 contribute to Tdiv0 and Tdiv1+ by calculating the standard deviation in division times when  
 1170 scaling each parameter by 0.2, 0.33, 0.4, 0.5, 0.66, 1.0, 1.5, 2.0, 2.5, 3.0, or 5.0-fold. 2 out of 55  
 1171 parameters stood out as the best candidates for tuning Tdiv0 and Tdiv1+: retinoblastoma (Rb)  
 1172 decay rate and cyclin B (CycB) synthesis rate, respectively (Fig. S2C). Rb decay rate was tuned  
 1173 to be 10% of the original value, whereas CycB was tuned to be 1.8-fold the original value to  
 1174 achieve a later and more dose-responsive Tdiv0, shorter Tdiv1+, and smaller divider  
 1175 percentage (Fig. S2D,E,F).

1176

1177 A simulation of 300 cells with distributed parameters before and after parameter tuning showed  
1178 that mean Tdiv0 for dividers increased from 36.14 hours to 62.80 hours for high dose of CD40  
1179 stimulation, and from 40.65 hours to 74.78 hours for low dose, achieving both a later and more  
1180 dose-responsive Tdiv0, resulting in much more agreement with the FlowMax output based on  
1181 experimental data (Table S1, left 3 columns). The mean Tdiv1+ for dividers decreases from  
1182 around 9 hours to 6 hours for all doses, which is in concordant with high dose of CD40, but in  
1183 less agreement with medium and low doses (Table S1, right 3 columns). Table S2 also showed  
1184 the percentage of dividers out of all founder cells decreased for all doses, while maintaining  
1185 CD40 dose-responsiveness.

1186

1187

**Table S1. Experimental vs. Model proliferation time before (1) & after (2) tuning**

| Condition   | EXP Tdiv0 | MODEL(1) Tdiv0 | MODEL(2) Tdiv0 | EXP Tdiv1+ | MODEL(1) Tdiv1+ | MODEL(2) Tdiv1+ |
|-------------|-----------|----------------|----------------|------------|-----------------|-----------------|
| CD40 high   | 68.5      | 36.1           | 60.7           | 6.1        | 9.0             | 6.2             |
| CD40 medium | 68.6      | 35.7           | 66.2           | 7.8        | 9.2             | 6.0             |
| CD40 low    | 76.9      | 40.6           | 79.4           | 35.2       | 9.7             | 6.3             |

1188

1189

**Table S2. Experimental vs. Model divider percentage before (1) & after (2) tuning**

| Condition   | EXP F0 | MODEL(1) F0 | MODEL(2) F0 |
|-------------|--------|-------------|-------------|
| CD40 high   | 46.8%  | 58.3%       | 46.3%       |
| CD40 medium | 18.4%  | 46.3%       | 34.7%       |
| CD40 low    | 4.4%   | 24.0%       | 21.0%       |

1190
